# Supplementary material for: In Vitro and In Silico Studies for the Identification of Potent Metabolites of Some High-Altitude Medicinal Plants from Nepal Inhibiting SARS-CoV-2 Spike Protein
Source: MDPI journal article supplement (doi:10.3390/molecules27248957), 2022-12-15
Supplement: s1 [file s1]

# In Vitro and In Silico Studies for the Identification of Potent Metabolites of Some High-Altitude Medicinal Plants from Nepal Inhibiting SARS-CoV-2 Spike Protein

Saroj Basnet <sup>1,†</sup>, Rishab Marahatha <sup>2,3,†</sup>, Asmita Shrestha <sup>2,†</sup>, Salyan Bhattarai <sup>4</sup>, Saurav Katuwal <sup>2</sup>, Khaga Raj Sharma <sup>2</sup>, Bishnu P. Marasini <sup>5</sup>, Salik Ram Dahal <sup>3,6</sup>, Ram Chandra Basnyat <sup>2</sup>, Simon G. Patching <sup>7,\*</sup> and Niranjana Parajuli <sup>2,\*</sup>

<sup>1</sup> Center for Drug Design and Molecular Simulation Division, Kathmandu 44600,

<sup>2</sup> Central Department of Chemistry, Tribhuvan University, Kathmandu 44618, Nepal

<sup>3</sup> Department of Chemistry, Oklahoma State University, Still Water, OK 74078, USA

<sup>4</sup> Paraza Pharma, Inc., 2525 Avenue Marie-Curie, Montreal, QC H4S 2E1, Canada

<sup>5</sup> Nepal Health Research Council, Ramshah Path, Kathmandu 44600, Nepal

<sup>6</sup> Oakridge National Laboratory, Bethel Valley Rd, Oak Ridge, TN 37830, USA

<sup>7</sup> Independent Researcher, Leeds LS2 9JT, UK

\* Correspondence: sgp\_uk2000@yahoo.co.uk (S.G.P.); niranjana.parajuli@cdc.tu.edu.np (N.P.)

† These authors contributed equally to this work.

**Table S1.** Measurements of absorbance at 450 nm and calculation of % of hACE2 bound to the S1-RBD, detected by an anti-Human HRP antibody and TMB. (n=3).

| S.N | Concentration (mg/mL) | Absorbance (mean) | % of hACE2 bound to the S1-RBD (mean) |
|-----|-----------------------|-------------------|---------------------------------------|
| 1.  | 0.0000000             | 0.643             | 100.00000                             |
| 2.  | 0.0390625             | 0.539             | 83.82582                              |
| 3.  | 0.0781250             | 0.519             | 80.71540                              |
| 4.  | 0.1562500             | 0.489             | 76.04977                              |
| 5.  | 0.3125000             | 0.437             | 67.96267                              |
| 6.  | 0.6250000             | 0.376             | 58.47589                              |
| 7.  | 1.2500000             | 0.323             | 50.23328                              |
| 8.  | 2.5000000             | 0.275             | 42.76827                              |
| 9.  | 5.0000000             | 0.212             | 32.97045                              |

**Table S2.** GOLD fitness score, binding free energy, and protein-ligand interactions of natural compounds with the S1-RBD region (6M0J).

| Compound             | GOLD Fitness Score | Binding free energy ( $\Delta G_{\text{bind}}$ ) (Kcal/mol) | Interacting residues | Bond Length (Å) |
|----------------------|--------------------|-------------------------------------------------------------|----------------------|-----------------|
| Cordifolioside-B (2) | 43.06              | -9.3                                                        | Thr430               | 2.8             |
|                      |                    |                                                             | Phe515               | 2.2             |
| Cordioside (3)       | 40.64              | -7.7                                                        | Thr430               | 2.6/3.7         |
|                      |                    |                                                             | Glu516               | 2.3             |
|                      |                    |                                                             | Leu517               | 2.0/2.9         |
| Cordifolide-A (4)    | 47.85              | -8.9                                                        | Asp428               | 2.2             |
|                      |                    |                                                             | Thr430               | 2.9             |
| Cordifolide-B (5)    | 44.45              | -9.7                                                        | Asp428               | 2.0             |
|                      |                    |                                                             | Thr430               | 3.0             |
| Cordifolide-C (6)    | 42.63              | -9.8                                                        | Arg355               | 3.1             |
|                      |                    |                                                             | Asp428               | 2.1             |

|                    |       |        |        |         |
|--------------------|-------|--------|--------|---------|
| Tinosporaside (7)  | 39.92 | -9.3   | Thr430 | 3.5     |
|                    |       |        | Asp428 | 2.2     |
| Tinosporiside (8)  | 38.38 | -8.4   | Arg355 | 2.9     |
| Amritoside-A (9)   | 41.26 | -6.8   | Thr430 | 2.9     |
|                    |       |        | Glu516 | 2.2     |
| Amritoside-B (10)  | 50.08 | -6.9   | Asp428 | 2.4     |
|                    |       |        | Leu517 | 3.5     |
|                    |       |        | Glu516 | 2.2     |
| Amritoside-C (11)  | 41.70 | -7.2   | Glu516 | 2.2     |
| Amritoside-D (12)  | 40.62 | -7.3   | Glu516 | 1.9     |
| Palmitoside-F (13) | 46.82 | -8.8   | Arg355 | 3.2     |
| Palmitoside-G (14) | 50.80 | -21.23 | Asp428 | 1.9/2.1 |

**Table S3.** Residues present in the active site and their RMSF values (Å) in the S1-RBD region.

| Residue | Cordifolioside-A |
|---------|------------------|
| 333     | 0.3766           |
| 334     | 0.1627           |
| 335     | 0.1254           |
| 336     | 0.0966           |
| 337     | 0.0938           |
| 338     | 0.0869           |
| 339     | 0.0981           |
| 340     | 0.0921           |
| 341     | 0.073            |
| 342     | 0.0754           |
| 343     | 0.0856           |
| 344     | 0.0959           |
| 345     | 0.137            |
| 346     | 0.1225           |
| 347     | 0.081            |
| 348     | 0.0636           |
| 349     | 0.0604           |
| 350     | 0.0588           |
| 351     | 0.0625           |
| 352     | 0.0653           |
| 353     | 0.0598           |
| 354     | 0.0615           |
| 355     | 0.0624           |
| 356     | 0.0609           |
| 357     | 0.0686           |
| 358     | 0.0675           |
| 359     | 0.082            |
| 360     | 0.0936           |
| 361     | 0.0906           |
| 362     | 0.1027           |
| 363     | 0.1138           |
| 364     | 0.1219           |
| 365     | 0.1296           |
| 366     | 0.1833           |
| 367     | 0.1865           |
| 368     | 0.147            |

|     |        |
|-----|--------|
| 369 | 0.1846 |
| 370 | 0.2354 |
| 371 | 0.215  |
| 372 | 0.1858 |
| 373 | 0.1905 |
| 374 | 0.1277 |
| 375 | 0.1226 |
| 376 | 0.1021 |
| 377 | 0.0898 |
| 378 | 0.0765 |
| 379 | 0.0723 |
| 380 | 0.0784 |
| 381 | 0.0914 |
| 382 | 0.0902 |
| 383 | 0.1042 |
| 384 | 0.1351 |
| 385 | 0.1563 |
| 386 | 0.1378 |
| 387 | 0.1221 |
| 388 | 0.1317 |
| 389 | 0.1269 |
| 390 | 0.1043 |
| 391 | 0.0815 |
| 392 | 0.0655 |
| 393 | 0.0768 |
| 394 | 0.0723 |
| 395 | 0.0556 |
| 396 | 0.054  |
| 397 | 0.0497 |
| 398 | 0.0489 |
| 399 | 0.0494 |
| 400 | 0.0462 |
| 401 | 0.0487 |
| 402 | 0.0524 |
| 403 | 0.0672 |
| 404 | 0.0796 |
| 405 | 0.0867 |
| 406 | 0.0706 |
| 407 | 0.0694 |
| 408 | 0.0847 |
| 409 | 0.0793 |
| 410 | 0.0656 |
| 411 | 0.069  |
| 412 | 0.0787 |
| 413 | 0.112  |
| 414 | 0.0899 |
| 415 | 0.0895 |
| 416 | 0.0893 |
| 417 | 0.0868 |
| 418 | 0.0717 |
| 419 | 0.0697 |

|     |        |
|-----|--------|
| 420 | 0.0745 |
| 421 | 0.0719 |
| 422 | 0.0644 |
| 423 | 0.0592 |
| 424 | 0.0656 |
| 425 | 0.0712 |
| 426 | 0.0812 |
| 427 | 0.0919 |
| 428 | 0.0878 |
| 429 | 0.0745 |
| 430 | 0.0742 |
| 431 | 0.063  |
| 432 | 0.0575 |
| 433 | 0.0582 |
| 434 | 0.0579 |
| 435 | 0.0617 |
| 436 | 0.0624 |
| 437 | 0.0643 |
| 438 | 0.0631 |
| 439 | 0.0752 |
| 440 | 0.0929 |
| 441 | 0.0843 |
| 442 | 0.0681 |
| 443 | 0.0773 |
| 444 | 0.1006 |
| 445 | 0.1181 |
| 446 | 0.1258 |
| 447 | 0.1056 |
| 448 | 0.0808 |
| 449 | 0.0882 |
| 450 | 0.0877 |
| 451 | 0.07   |
| 452 | 0.0693 |
| 453 | 0.0675 |
| 454 | 0.0686 |
| 455 | 0.0821 |
| 456 | 0.0983 |
| 457 | 0.099  |
| 458 | 0.108  |
| 459 | 0.0972 |
| 460 | 0.0872 |
| 461 | 0.082  |
| 462 | 0.0841 |
| 463 | 0.0789 |
| 464 | 0.0778 |
| 465 | 0.0799 |
| 466 | 0.0775 |
| 467 | 0.0749 |
| 468 | 0.0781 |
| 469 | 0.0895 |
| 470 | 0.107  |

|     |        |
|-----|--------|
| 471 | 0.1236 |
| 472 | 0.1143 |
| 473 | 0.2459 |
| 474 | 0.3285 |
| 475 | 0.5356 |
| 476 | 0.5795 |
| 477 | 0.5066 |
| 478 | 0.4137 |
| 479 | 0.3224 |
| 480 | 0.2261 |
| 481 | 0.2885 |
| 482 | 0.3086 |
| 483 | 0.3114 |
| 484 | 0.3539 |
| 485 | 0.3893 |
| 486 | 0.3112 |
| 487 | 0.2814 |
| 488 | 0.179  |
| 489 | 0.1208 |
| 490 | 0.1065 |
| 491 | 0.0825 |
| 492 | 0.0845 |
| 493 | 0.0835 |
| 494 | 0.0797 |
| 495 | 0.0706 |
| 496 | 0.0856 |
| 497 | 0.0749 |
| 498 | 0.0854 |
| 499 | 0.1089 |
| 500 | 0.1363 |
| 501 | 0.1318 |
| 502 | 0.1317 |
| 503 | 0.1282 |
| 504 | 0.1094 |
| 505 | 0.0873 |
| 506 | 0.0643 |
| 507 | 0.0535 |
| 508 | 0.0503 |
| 509 | 0.0483 |
| 510 | 0.0471 |
| 511 | 0.0472 |
| 512 | 0.0471 |
| 513 | 0.0517 |
| 514 | 0.0586 |
| 515 | 0.0665 |
| 516 | 0.0756 |
| 517 | 0.098  |
| 518 | 0.1214 |
| 519 | 0.1545 |
| 520 | 0.1523 |
| 521 | 0.1352 |

|     |        |
|-----|--------|
| 522 | 0.1042 |
| 523 | 0.1003 |
| 524 | 0.076  |
| 525 | 0.1044 |
| 526 | 0.1763 |

**Table S4.** ADMET properties of the major compounds of *T. cordifolia* (1-14) by pkCSM server.

|              | Parameter                               | 1      | 2      | 3      | 4      | 5      | 6      | 7      | 8      | 9      | 10     | 11     | 12     | 13     | 14     |
|--------------|-----------------------------------------|--------|--------|--------|--------|--------|--------|--------|--------|--------|--------|--------|--------|--------|--------|
| Absorption   | Water solubility (log mol/L)            | -1.965 | -2.112 | -2.88  | -3.504 | -3.393 | -3.393 | -3.079 | -3.073 | -4.633 | -2.704 | -3.823 | -3.757 | -4.819 | -2.936 |
|              | Caco2 permeability (log Papp 10-6 cm/s) | -0.368 | -0.613 | -0.408 | -0.307 | 0.591  | 0.591  | -0.348 | -0.386 | 1.077  | -0.237 | 1.178  | 1.267  | 0.485  | -0.404 |
|              | Intestinal absorption (% absorbed)      | 31.087 | 46.863 | 52.66  | 49.384 | 69.799 | 69.799 | 59.506 | 54.034 | 94.917 | 43.031 | 92.024 | 95.383 | 100    | 57.067 |
|              | Skin permeability (log Kp)              | -2.735 | -2.737 | -2.743 | -2.737 | -2.735 | -2.735 | -2.919 | -2.784 | -3.485 | -2.735 | -3.38  | -3.538 | -3.203 | -2.784 |
| Distribution | VDss (Human, log L/Kg)                  | 0.009  | -0.293 | -0.515 | 0.02   | -0.003 | -0.003 | -1.01  | -0.673 | 0.114  | -0.73  | 0.008  | 0.151  | -0.079 | -0.611 |
|              | BBB Permeability (logBB)                | -1.636 | -1.884 | -1.682 | -1.836 | -1.435 | -1.435 | -1.553 | -1.348 | -0.364 | -1.467 | -0.653 | -0.233 | -0.922 | -1.384 |
|              | CNS Permeability (log PS)               | -5.353 | -4.946 | -4.934 | -4.925 | -4.591 | -4.591 | -5.079 | -4.194 | -2.906 | -3.564 | -3.017 | -2.966 | -3.05  | -4.273 |
| Metabolism   | CYP1A2                                  | NO     |
|              | CYP2C19                                 | NO     |
|              | CYP2C9                                  | NO     |
|              | CYP2D6                                  | NO     |
|              | CYP3A4                                  | NO     | YES    | NO     | YES    | NO     |
| Excretion    | Renal OCT2 substrate clearance          | NO     |
|              | Total Clearance (logml/min/kg)          | 0.846  | 0.768  | 0.857  | 0.541  | 0.574  | 0.574  | 0.637  | 0.605  | 1.247  | 0.978  | 1.058  | 1.021  | 0.878  | 0.755  |
| Toxicity     | Ames Toxicity                           | NO     |
|              | Hepatotoxicity                          | NO     | YES    | YES    | NO     | NO     | NO     |
|              | LD50                                    | 2.778  | 2.949  | 3.78   | 3.471  | 3.003  | 3.354  | 3.521  | 3.113  | 2.988  | 2.77   | 3.718  | 3.57   | 3.844  | 3.354  |

**Value Range : LogS (Solubility):** Optimal (higher than -4log mol/L) , **Papp (Caco-2 Permeability):** Optimal (higher than -5.15 Log unit or -4.70 or -4.80) , **HIA (Human Intestinal Absorption):** >30% Perfectly absorbed , **VD (Volume Distribution):** Optimal (0.04-20 L/Kg) , **BBB (Blood Brain Carrier):** ( BB ratio >=0.1: BBB+ ; BB ratio <0.1: BBB-) , **Total Clearance:** >15 ml/min/kg: High; 5 ml/min/kg< CL< 15ml/min/kg: Moderate; <5 ml/min/kg: Low, **LD<sub>50</sub>(LD<sub>50</sub> of acute toxicity):** High-toxicity: (1-50 mg/kg); Moderate-toxicity: (51-500 mg/kg); Low-Toxicity: (501-5000 mg/kg).

**Table S5.** Prediction of toxicity of secondary metabolites inhibiting metabolic enzymes using ProTox-II.

| Compounds            | LD <sub>50</sub> mg/Kg | Toxicity class | Active target                                  | Probability |
|----------------------|------------------------|----------------|------------------------------------------------|-------------|
| Cordifolioside-A (1) | 4000                   | 5              | Immunotoxicity                                 | 0.99        |
| Cordifolioside-B (2) | 4000                   | 5              | Immunotoxicity                                 | 0.99        |
| Cordioside (3)       | 274                    | 3              | Immunotoxicity                                 | 0.96        |
|                      |                        |                | Mitochondrial Membrane Potential (MMP)         | 0.76        |
| Cordifolide-A (4)    | 244                    | 4              | Immunotoxicity                                 | 0.99        |
|                      |                        |                | Mitochondrial Membrane Potential (MMP)         | 0.71        |
|                      |                        |                | P53                                            | 0.74        |
| Cordifolide-B (5)    | 500                    | 4              | Immunotoxicity                                 | 0.99        |
|                      |                        |                | Cytotoxicity                                   | 0.79        |
|                      |                        |                | Alpha Estrogen receptor ligand- binding domain | 0.76        |
|                      |                        |                | Mitochondrial Membrane Potential (MMP)         | 0.81        |
|                      |                        |                |                                                |             |
| Cordifolide-C (6)    | 500                    | 4              | Immunotoxicity                                 | 0.99        |
|                      |                        |                | Cytotoxicity                                   | 0.79        |
|                      |                        |                | Alpha Estrogen receptor ligand- binding domain | 0.76        |
|                      |                        |                | Mitochondrial Membrane Potential (MMP)         | 0.81        |
|                      |                        |                |                                                |             |
| Tinosporaside (7)    | 274                    | 3              | Immunotoxicity                                 | 0.99        |
| Tinosporaside (8)    | 280                    | 3              | Immunotoxicity                                 | 0.96        |
| Amritoside-A (9)     | 274                    | 3              | Immunotoxicity                                 | 0.97        |
| Amritoside-B (10)    | 244                    | 3              | -                                              | -           |
| Amritoside-C (11)    | 555                    | 4              | Immunotoxicity                                 | 0.96        |
|                      |                        |                | Aromatase                                      | 0.79        |
|                      |                        |                | Mitochondrial Membrane Potential (MMP)         | 0.83        |
|                      |                        |                | P53                                            | 0.72        |
|                      |                        |                |                                                |             |
| Amritoside-D (12)    | 274                    | 3              | Immunotoxicity                                 | 0.96        |
|                      |                        |                | Estrogen Receptor Alpha (ER)                   | 0.75        |
|                      |                        |                | PPAR-gamma                                     | 0.73        |
|                      |                        |                | Mitochondrial Membrane Potential (MMP)         | 0.77        |
| Palmitoside-F (13)   | 310                    | 3              | Immunotoxicity                                 | 0.99        |
| Palmitoside-G (14)   | 274                    | 3              | Immunotoxicity                                 | 0.98        |

**Table S6.** List of major natural compounds of *T. cordifolia*.

| Pharmacological properties | Major natural compounds selected for the study |
|----------------------------|------------------------------------------------|
|                            | Cordifolioside A(1)                            |
|                            | Cordifolioside-B(2)                            |
|                            | Cordioside(3)                                  |
| 1. Anti-SARS (2)           | Cordifolide-A(4)                               |
| 2. Anti-Influenza (3)      | Cordifolide-B(5)                               |
| 3. Anti-Herpes (4)         | Cordifolide-C(6)                               |
| 4. Anti-HIV (5)            | Tinosporaside(7)                               |
| 5. Anti-bacterial (6)      | Tinosporiside(8)                               |
| 6. Anti-fungal (7)         | Amritoside-A(9)                                |
| 7. Anti-malarial (8)       | Amritoside-B(10)                               |
| 8. Anti-inflammatory (9)   | Amritoside-C(11)                               |
|                            | Amritoside-D(12)                               |
|                            | Palmitoside-F(13)                              |
|                            | Palmitoside-G(14)                              |



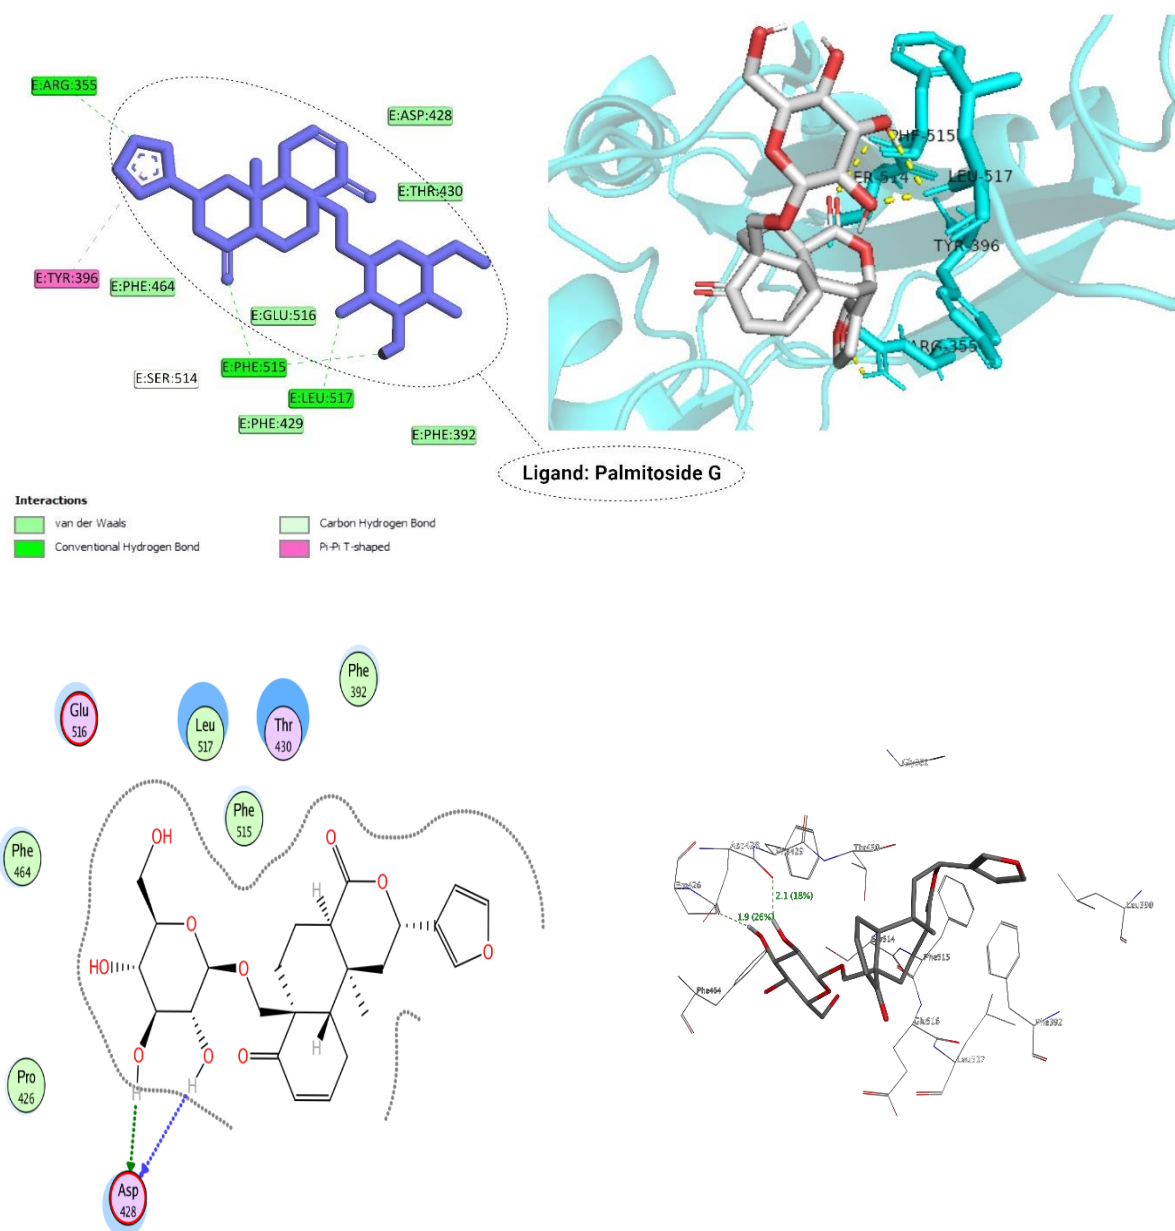

**Figure S1.** Binding interactions and 2D (left) and 3D (right) interaction of palmitoside-G (14) with S1-RBD.
